# Supplementary material for: En Bloc Versus Conventional Transurethral Resection for Non-Muscle-Invasive Bladder Cancer: An Expanded and Updated Systematic Review and Meta-Analysis Reconciling Contemporary Evidence onOncological, Pathological, and Safety Outcomes
Source: Research Square preprint supplement (doi:10.21203/rs.3.rs-7631349/v1), 2025-10-09
Supplement: Supplementary file 1 [file ad694dab397a7dbeecd250e8.docx]

**Supplementary** **Figure Legends**

**Supplementary Forest Plot:**

Supplementary Figure 1.1. Forest plot of 12-Month Tumor Recurrence Rates: Laser vs. Non-Laser Subgroups


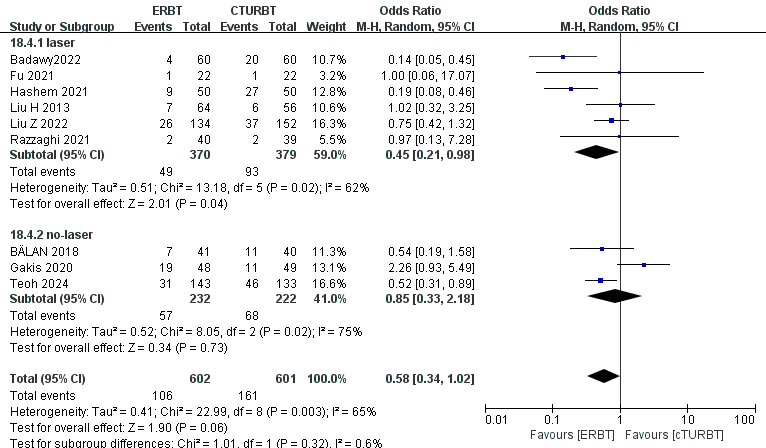


Supplementary Figure 1.2. Forest plot of 24-Month Tumor Recurrence Rates: Laser vs. Non-Laser Subgroups


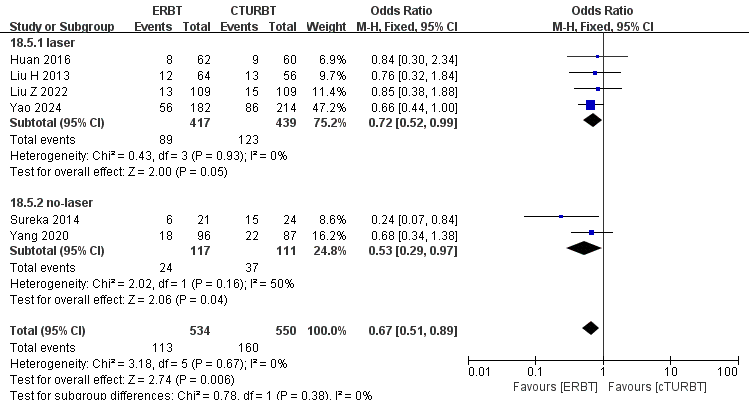


Supplementary Figure 1.3. Forest plot of 36-Month Tumor Recurrence Rates: Laser vs. Non-Laser Subgroups


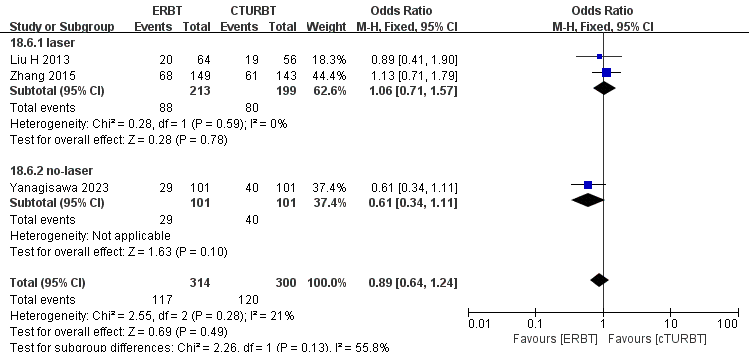


Supplementary Figure 2.1. Forest plot of 12-Month Tumor Progression Rates: Laser vs. Non-Laser Subgroups


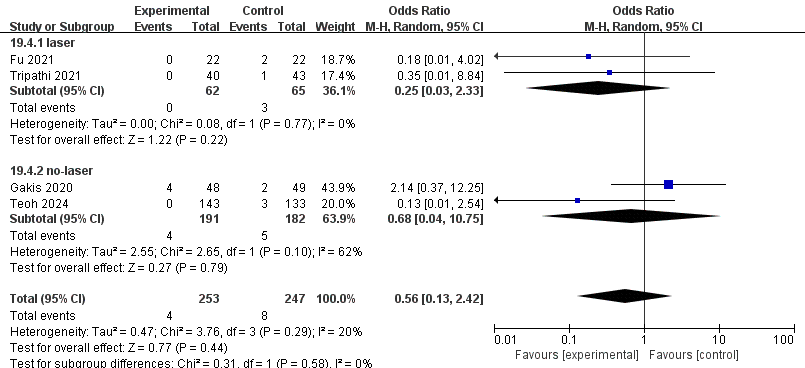


Supplementary Figure 2.2. Forest plot of 24-Month Tumor Progression Rates: Laser vs. Non-Laser Subgroups


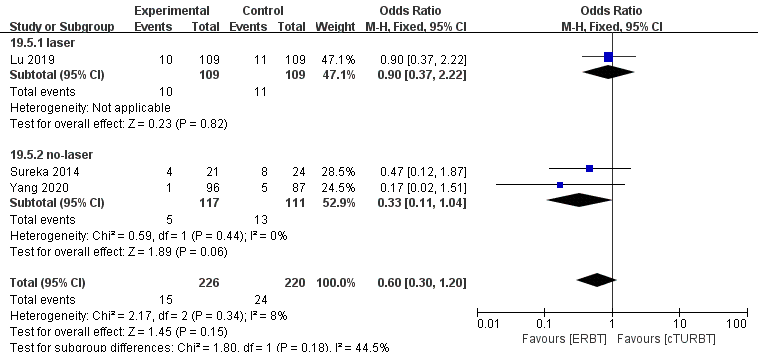


Supplementary Figure 3.1. Forest plot of Detrusor Muscle Presence: Laser vs. Non-Laser Subgroups


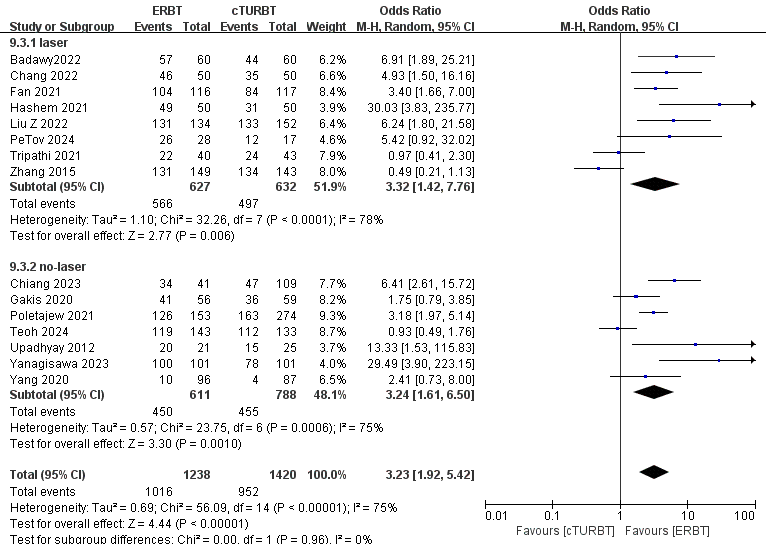


Supplementary Figure 3.2. Forest plot of Detrusor Muscle Presence by Tumor Size Subgroups (＜3 cm vs. >3 cm)


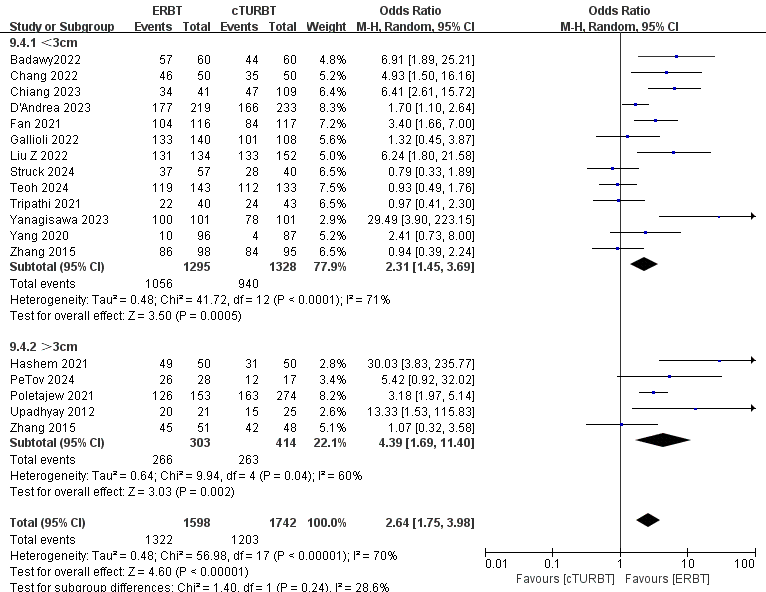


Supplementary Figure 4.1. Forest plot of Residual Tumor: Laser vs. Non-Laser Subgroups


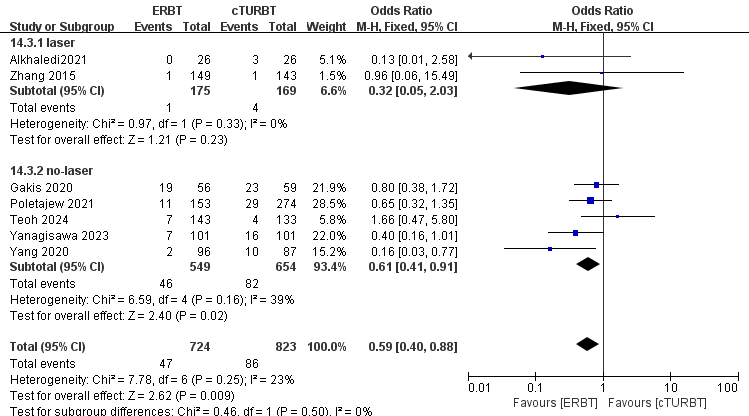


Supplementary Figure 4.2. Forest plot of Residual Tumor by Tumor Size Subgroups (＜3 cm vs. >3 cm)


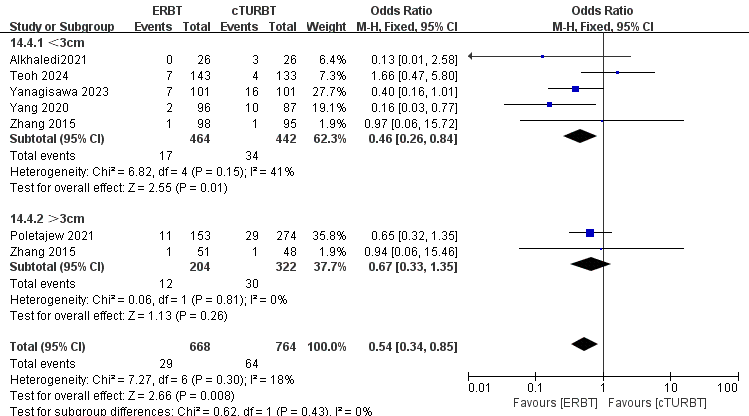


Supplementary Figure 5.1. Forest plot of Bladder Perforation: Laser vs. Non-Laser Subgroups


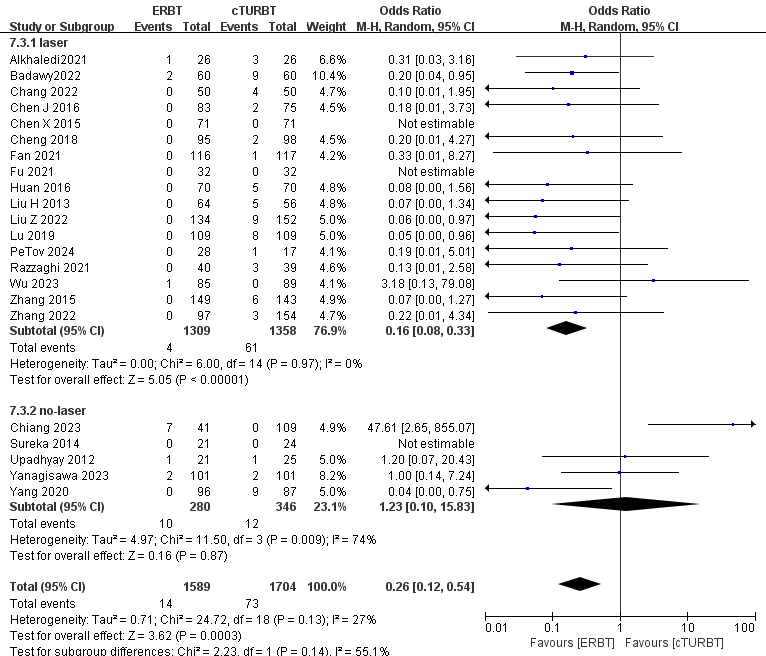


Supplementary Figure 5.2. Forest plot of Bladder Perforation by Tumor Size Subgroups (＜3 cm vs. >3 cm)


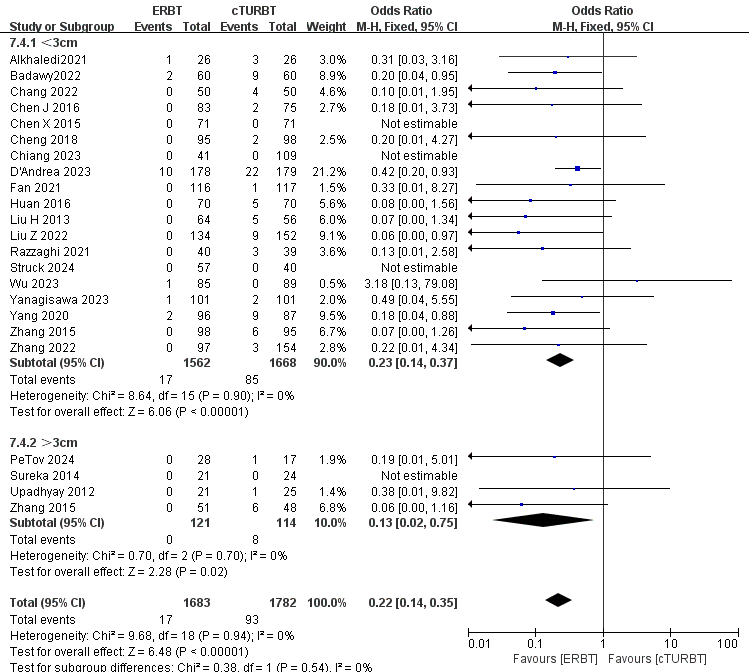


Supplementary Figure 6.1. Forest plot of Obturator Nerve Reflex: Laser vs. Non-Laser Subgroups


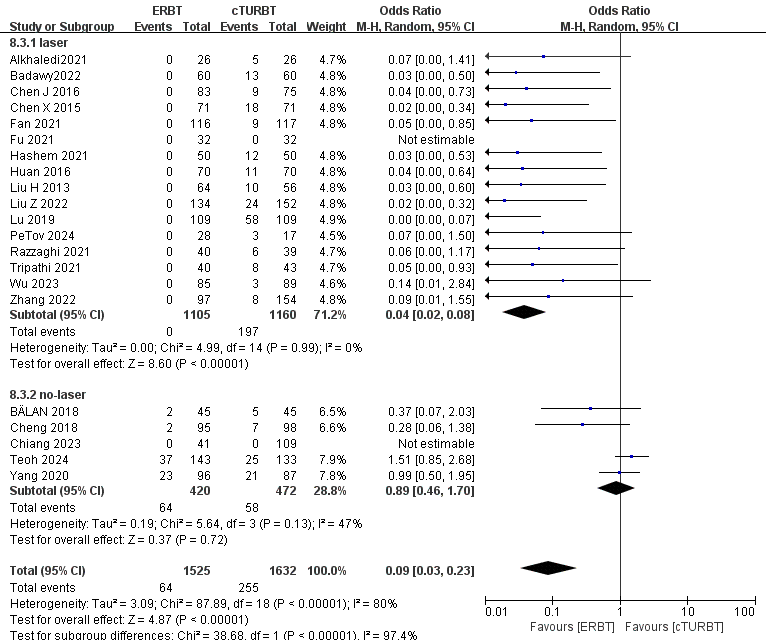


Supplementary Figure 6.2. Forest plot of Obturator Nerve Reflex by Tumor Size Subgroups (＜3 cm vs. >3 cm)


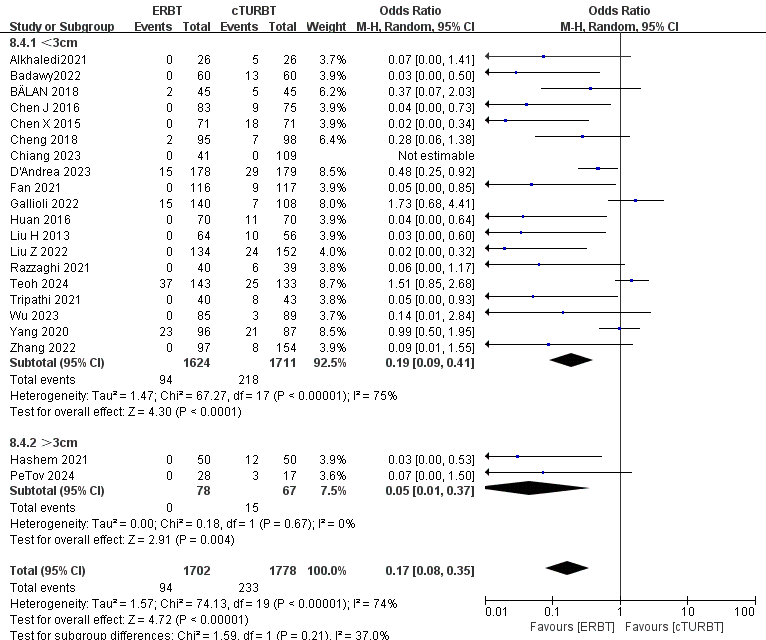


Supplementary Figure 7.1. Forest plot of Re-TURBT: Laser vs. Non-Laser Subgroups


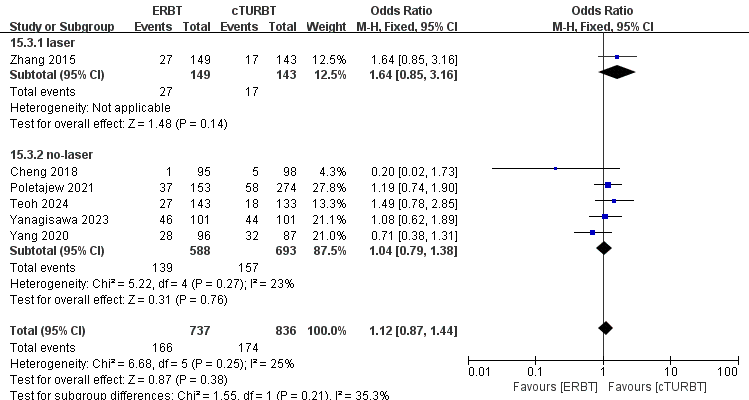


Supplementary Figure 7.2. Forest plot of Re-TURBT by Tumor Size Subgroups (＜3 cm vs. >3 cm)


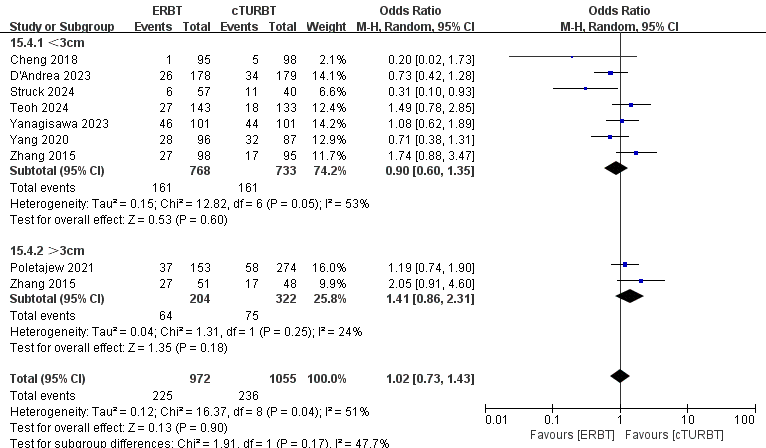


Supplementary Figure 8.1. Forest plot of Catheterization Duration: Laser vs. Non-Laser Subgroups


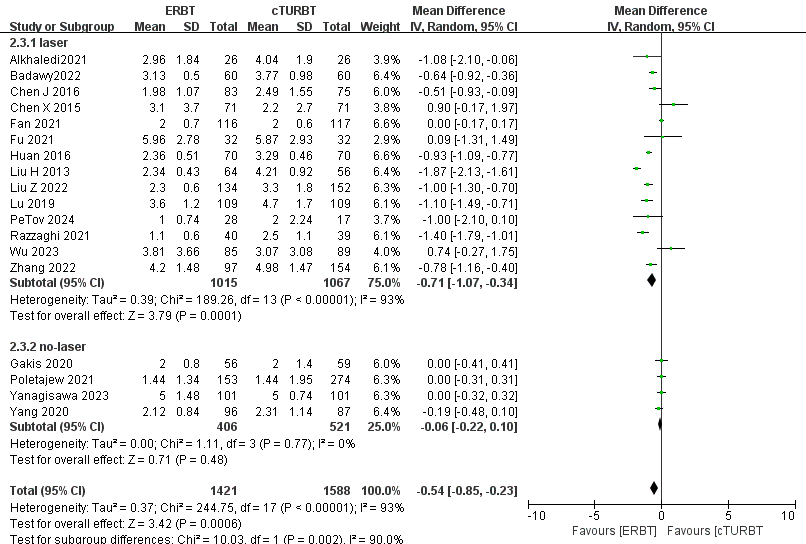


Supplementary Figure 8.2. Forest plot of Catheterization Duration by Tumor Size Subgroups (＜3 cm vs. >3 cm)


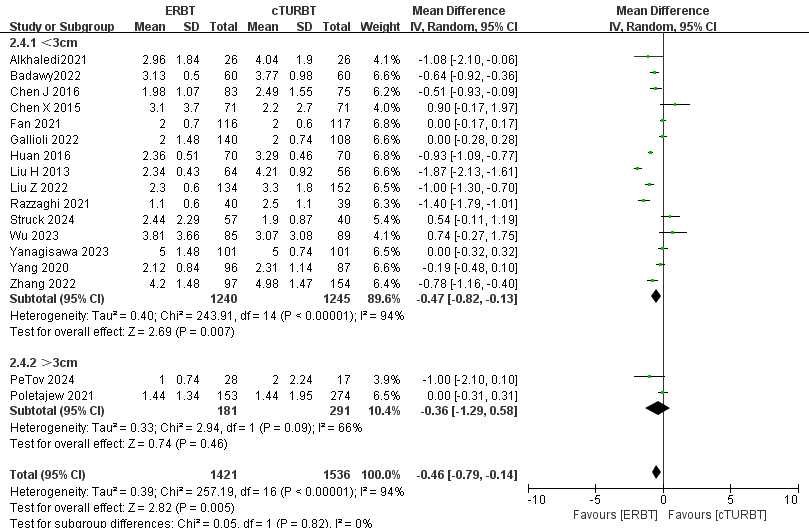


Supplementary Figure 9.1. Forest plot of Hospital Stay: Laser vs. Non-Laser Subgroups


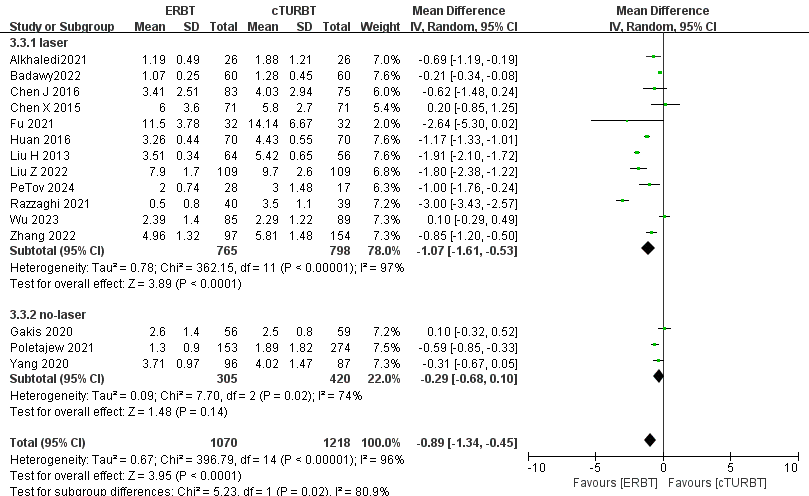


Supplementary Figure 9.2. Forest plot of Hospital Stay by Tumor Size Subgroups (＜3 cm vs. >3 cm)


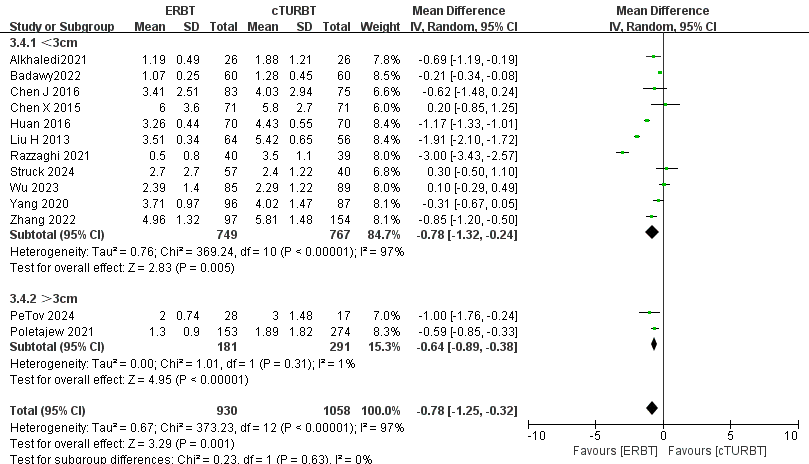


Supplementary Figure 10.1. Forest plot of Total Operative Time: Laser vs. Non-Laser Subgroups


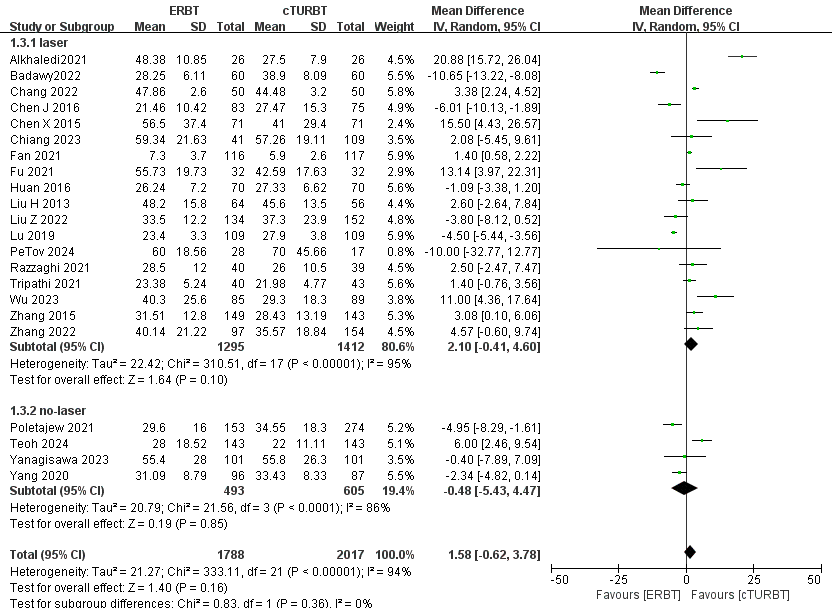


Supplementary Figure 10.2. Forest plot of Total Operative Time by Tumor Size Subgroups (＜3 cm vs. >3 cm)


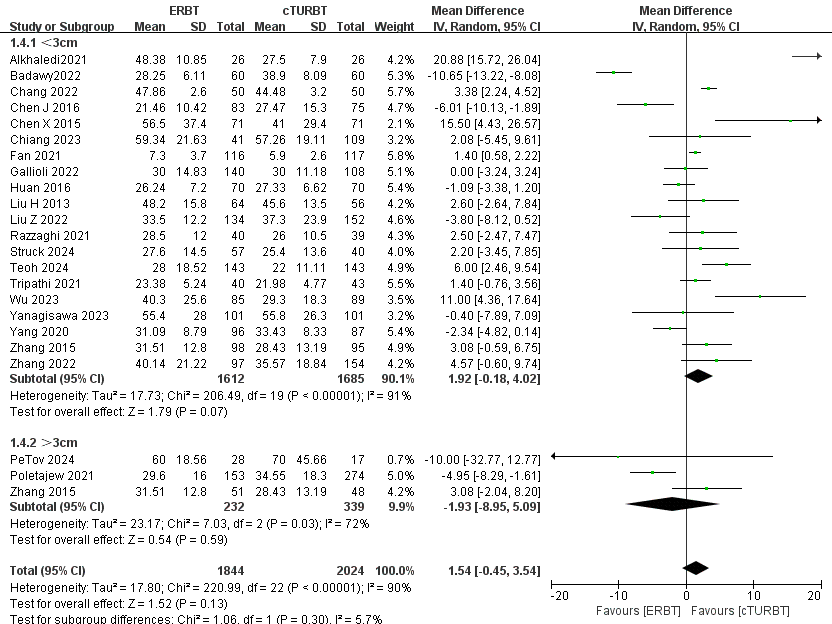


**Supplementary Funnel Plot:**

Supplementary Figure 11. Funnel Plot of Obturator Nerve Reflex.

**
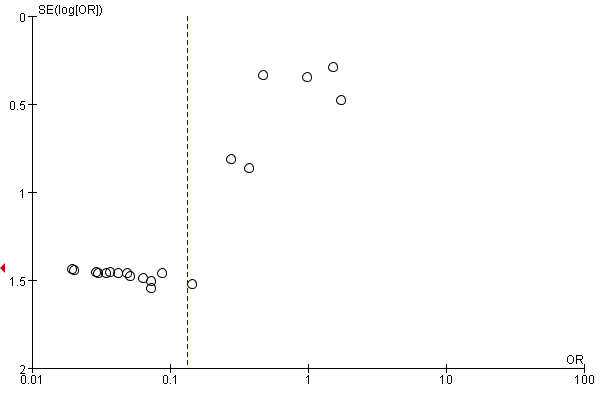
**

Supplementary Figure 12. Funnel Plot of Bladder Perforation.

**
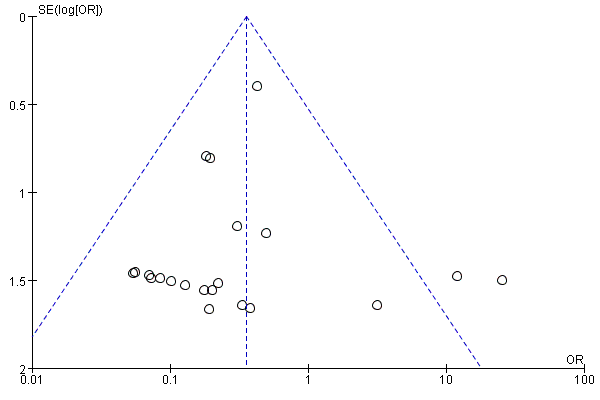
**
